# Supplementary material for: Mechanically robust biomass-derived carbonaceous foam for efficient solar water evaporation
Source: Royal Society of Chemistry journal article supplement (doi:10.1039/d2nj04579f), 2022-01-01
Supplement: d2nj04579f1.pdf [file d2nj04579f1.pdf]

Electronic Supplementary Material (ESI) for New Journal of Chemistry.

*Supporting information for*

## **Mechanically robust biomass-derived carbonaceous foam for efficient solar water evaporation**

Sainan Ma<sup>a,b</sup>, Yuhao Wu<sup>a</sup>, Ruiling Lv<sup>a</sup>, Xiang Gao<sup>b,\*</sup>, Qianqian Wang<sup>a,b,\*</sup>

<sup>a</sup> Ningbo Research Institute, Zhejiang University, Ningbo 315000, China

<sup>b</sup> The State Key Laboratory of Chemical Engineering, College of Chemical and Biological Engineering, Zhejiang University, Hangzhou, 310027, China

\*Email: gaox@zju.edu.cn, qqwanggood@zju.edu.cn

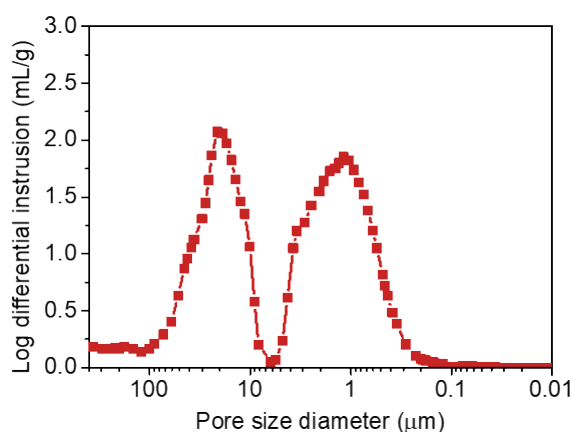

**Figure S1.** Pore size distribution curve of CBF obtained by mercury intrusion porosimetry.

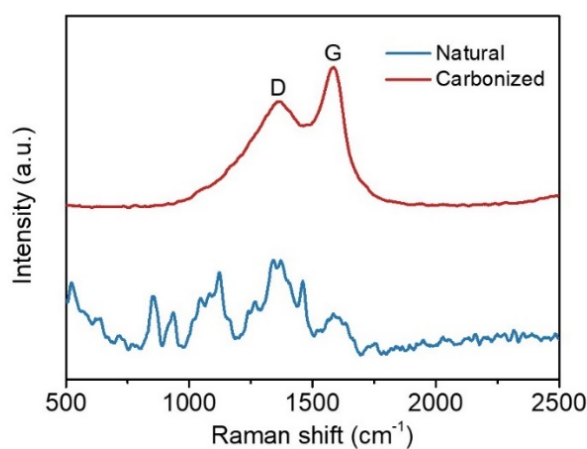

**Figure S2.** Raman spectra of freeze-dried natural banana and CBF.

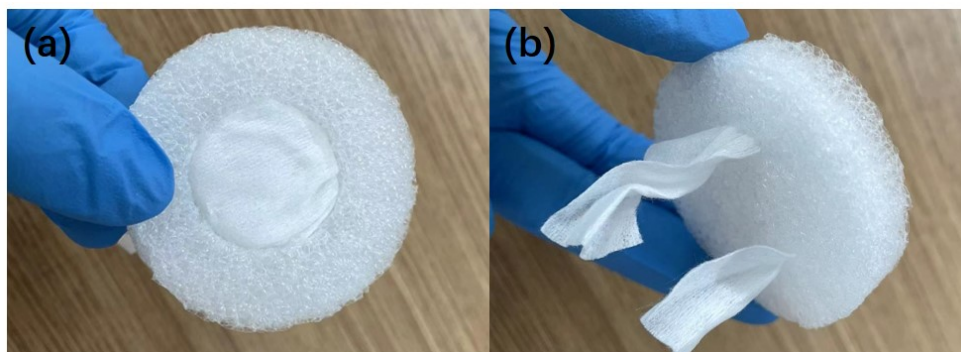

**Figure S3.** Digital images of designed insulator with air-laid paper as water path. (a) Top-view and (b) bottom-view.

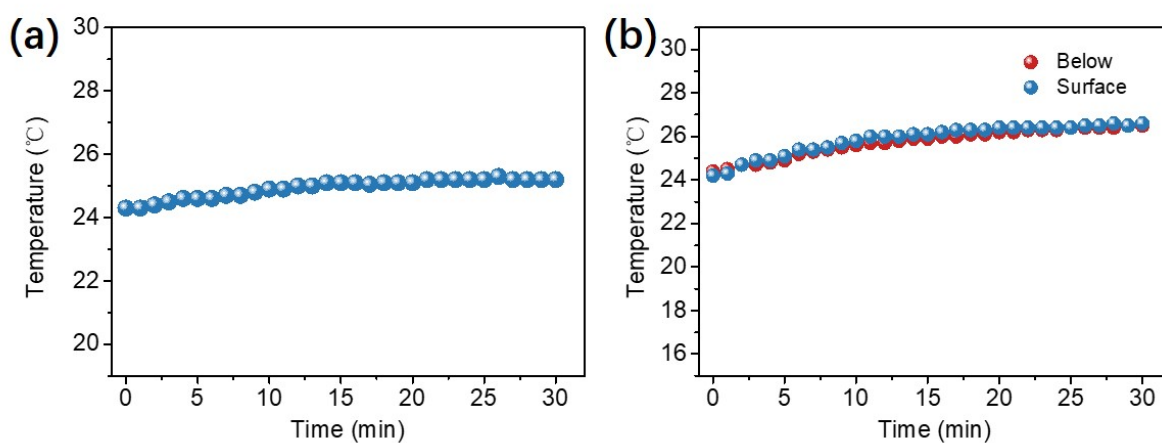

**Figure S4.** Time course of the below bulk water temperature of systems with (a) CBF, and (b) pure water under 1 sun illumination.

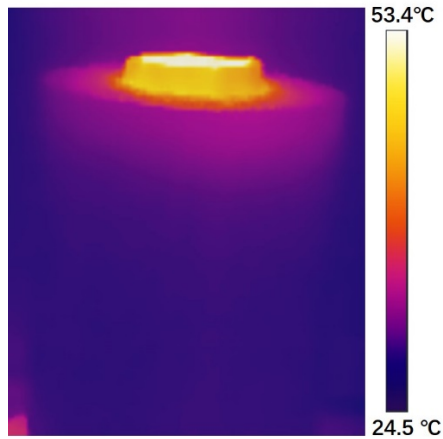

**Figure S5.** Side-view IR image of system with CBF under 3 sun illumination for 30 min.

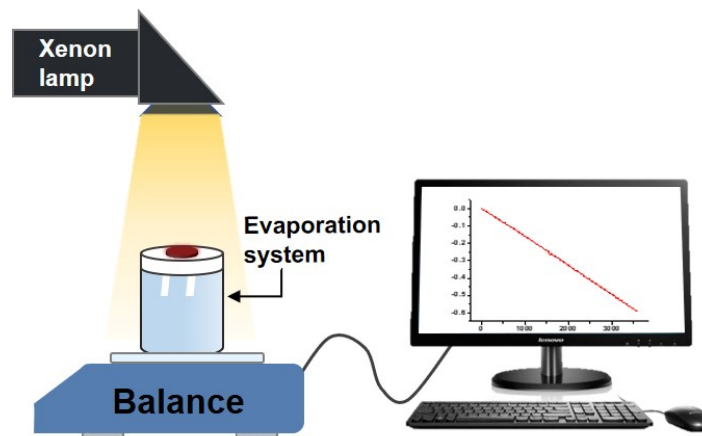

**Figure S6.** Schematic illustration of the setup for solar water evaporation.

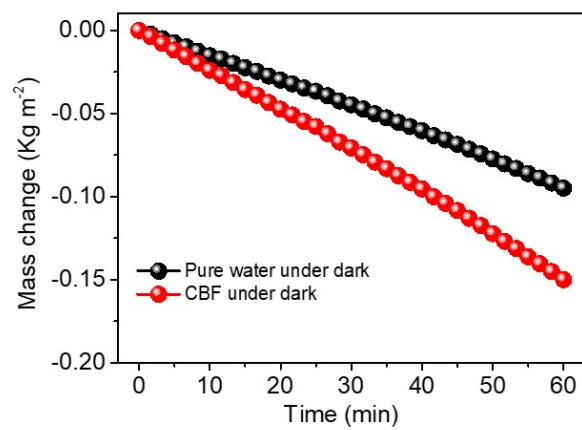

**Figure S7.** The evaporation mass change over time of systems with pure water and CBF under

dark field.

**Table S1.** Comparison of energy conversion efficiency ( $\eta_{th}$ ) of CBF with previous reported biomass-based absorbers under solar illumination of 1 kW m<sup>-2</sup>.

| Absorbers                                    | Evaporation rate<br>(kg m <sup>-2</sup> h <sup>-1</sup> ) | $\eta_{th}$ (%) | Reference                                               |
|----------------------------------------------|-----------------------------------------------------------|-----------------|---------------------------------------------------------|
| Carbonized mushroom                          | 1.475                                                     | ~78             | Adv Mater.<br>2017, 29:1606762.                         |
| Flame-Treated Wood                           | 1.05                                                      | 72              | ACS Appl. Mater. Interfaces<br>2017, 9, 17, 15052–15057 |
| Carbonized lotus<br>seedpods                 | 1.30                                                      | 86.5            | Chem. Mater.<br>2018, 30, 6217–6221                     |
| Carbonized de-sugaring<br>stems of sugarcane | 1.57                                                      | 87.44           | J. Mater. Chem. A<br>2019,7, 9034-9039                  |
| Carbonized daikon                            | 1.57                                                      | 85.9            | Sol. Energy Mater Sol. Cells<br>2019, 191, 83.          |
| Carbonized lime peels                        | 1.386                                                     | 90.88           | Sol. Energy Mater Sol. Cells<br>2020, 215, 110604.      |
| Carbonized potatoes                          | 1.48                                                      | 86              | J. Mater. Chem. A,<br>2020, 8, 9528                     |
| Carbonized rice husk                         | 1.0315                                                    | 71              | Renew. Energy<br>2020, 151, 1067.                       |
| Carbonized pomelo<br>peel                    | 1.37                                                      | 93.7            | ACS Sustainable Chem. Eng.<br>2021, 9, 4571–4582        |
| Pomelo@MXene                                 | 1.48                                                      | 92.3%           | Carbon<br>2022, 188, 265-275                            |
| PPy-bamboo                                   | 1.125                                                     | 76.87           | ACS Appl. Polym. Mater.<br>2022, 4, 4, 2393–2400        |
| <b>CBF</b>                                   | <b>1.51</b>                                               | <b>93.3</b>     | <b>This work</b>                                        |

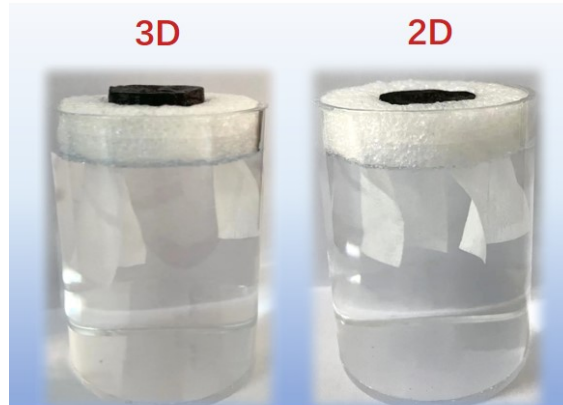

**Figure S8.** Digital images of solar absorber with 3D structure (left) and 2D structure (right).

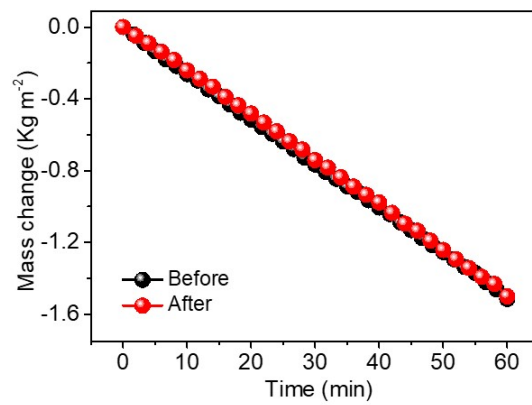

**Figure S9.** The evaporation mass change over time of CBF before (black) and after (red) being soaked in water for two weeks.

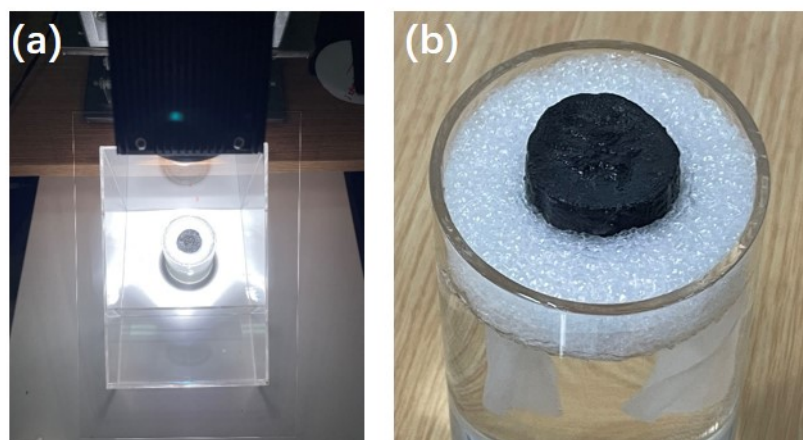

**Figure S10.** Digital images of (a) homemade setup for solar desalination and wastewater

treatment, and (b) CBF after continuous solar seawater evaporation under 1 sun illumination for 8 h.

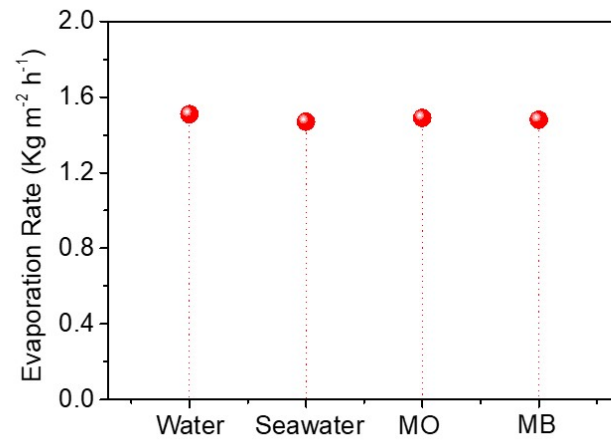

**Figure S11.** The evaporation mass change over time of systems using seawater, MO, and MB as raw water under 1 sun illumination.
